# Supplementary material
Source: PubMed Central journal article supplement (PMC4599368)
Supplement: NIHMS711069-supplement-3.pdf [file NIHMS711069-supplement-3.pdf]

1 **SUPPLEMENTAL INFORMATION**

2 **An intrinsically disordered peptide from Ebola virus VP35**  
3 **controls viral RNA synthesis by modulating nucleoprotein-**  
4 **RNA interactions**

5

6 Daisy W. Leung<sup>1#</sup>, Dominika M. Borek<sup>2#</sup>, Priya Luthra<sup>3</sup>, Jennifer M. Binning<sup>1</sup>, Manu  
7 Anantpadma<sup>4</sup>, Gai Liu<sup>1</sup>, Ian B. Harvey<sup>1</sup>, Zhaoming Su<sup>5</sup>, Ariel Endlich-Frazier<sup>3</sup>, Juanli  
8 Pan<sup>1</sup>, Reed S. Shabman<sup>3</sup>, Wah Chiu<sup>5</sup>, Robert Davey<sup>4</sup>, Zbyszek Otwinowski<sup>2</sup>, Christopher  
9 F. Basler<sup>3</sup>, and Gaya K. Amarasinghe<sup>1\*</sup>

10

11 <sup>1</sup>Department of Pathology and Immunology, Washington University School of Medicine,  
12 St Louis, MO 63110, United States

13 <sup>2</sup>Departments of Biophysics and Biochemistry, University of Texas Southwestern Medical  
14 Center at Dallas, TX 75390, United States

15 <sup>3</sup>Department of Microbiology, Icahn School of Medicine at Mount Sinai, New York, NY  
16 10029, United States

17 <sup>4</sup>Department of Virology and Immunology, Texas Biomedical Research Institute, San  
18 Antonio, TX 78227, United States

19 <sup>5</sup>National Center for Macromolecular Imaging, Baylor College of Medicine, Houston, TX  
20 77030, United States

21 #co-first authors

22 \*corresponding author

23 **SUPPLEMENTAL TABLE LEGEND**

24 **Table S1, related to Figure 2. Data collection, refinement and validation statistics.**

25 Summary of data collection, refinement, and validation statistics for the  $\Delta$ NP<sub>NTD</sub>/NPBP  
26 complex.

27  
28 **SUPPLEMENTAL FIGURE LEGENDS**

29 **Figure S1. Sequence alignments of ebolavirus NP and VP35 genes, related to**

30 **Figure 1 and 2. (A)** Sequence alignment of ebolavirus nucleoprotein molecules.

31 Sequences were aligned using ClustalW. Accession numbers used in this alignment are  
32 AAD14590.1, NC006432.1, YP003815432, YP003815423 and NP690580 for Ebola virus,  
33 Sudan virus, Bundibugyo virus, Taï Forest virus, and Reston virus, respectively.  
34 Secondary structural elements from PDB 4QB0 were included in the output.

35 Corresponding Western blots for results shown in **(B)** Figure 1E and **(C)** Figure 1F. **(D)**

36 Sequence alignment of ebolavirus VP35 proteins. Sequences were aligned using  
37 ClustalW. Accession numbers used in this alignment are AAD14590.1, ACR33188,  
38 ACI28621, ACI28630 and BAB69004 for ebolavirus, Sudan virus, Bundibugyo virus, Taï  
39 Forest virus, and Reston virus, respectively. Secondary structure elements from PDB  
40 3FKE were included in the output. Residues conserved across all ebolaviruses are  
41 colored red; partially conserved are colored pink; those not conserved are not highlighted.

42

43 **Figure S2.  $\Delta$ NP<sub>NTD</sub> and VP35 peptide forms a 1:1 complex in solution, related to**

44 **Figure 2 and 3. (A)** Pulldown assay showing binding between VP35 N-terminus and

45  $\Delta$ NP<sub>NTD</sub>. MBP-tagged VP35 1-168 was prebound on amylose resin (bound beads, BB)

46 prior to the addition of  $\Delta$ NP<sub>NTD</sub> (input, I). Shown are the final beads (FB) after 3 washes

47 (W). **(B)** ITC studies show that VP35 NPBP binds with high affinity to  $\Delta\text{NP}_{\text{NTD}}$ . A  
48 representative raw ITC data and corresponding binding isotherm for  $\Delta\text{NP}$  binding to VP35  
49 peptide are shown. Representative data is from at least 2-4 independent experiments.  
50 **(C)** Summary of EBOV VP35 peptide analysis. Shown are the results from ITC and CD  
51 measurements. **(D)** Representative CD measurements monitoring the mean residue  
52 ellipticity for EBOV peptides described in **(B)** in the absence (dotted lines) or presence of  
53 50% TFE (solid lines). **(E)** Analysis by SEC-MALS shows that the NPBP/ $\Delta\text{NP}_{\text{NTD}}$  complex  
54 elutes with a molecular mass of  $50 \pm 0.2$  kDa, indicating one molecule of  $\Delta\text{NP}_{\text{NTD}}$  with one  
55 NPBP. Data shown is representative from at least two independent experiments.

56

57 **Figure S3. The asymmetric unit of the NPBP/ $\Delta\text{NP}_{\text{NTD}}$  complex contains four**  
58 **complexes with 1:1 stoichiometry, related to Figures 2, 3, and 4. (A)** The individual  
59 NPBP/ $\Delta\text{NP}_{\text{NTD}}$  complexes are shown in yellow/orange (mol A/mol E), magenta/blue (mol  
60 B/mol F), green/purple (mol C/mol G), and cyan/pink (mol D/mol H). The asymmetric unit  
61 is shown in three different orientations to highlight how two NPBP/ $\Delta\text{NP}_{\text{NTD}}$  complexes of  
62 the asymmetric unit (e.g. mol A/mol E and mol C/mol G) form the subunits for one  
63 octameric ring, shown in **(B)** Only NP residues 37-385 and VP35 residues 20-47 were  
64 modeled in the final refined structure. **(C)** Surface and ribbon representation of three  
65 assembled NP molecules in the octameric ring (see **(B)** dotted line) highlighting the foot  
66 lobe interaction between adjacent NP molecules. **(D)** 2mFo-DFc maps for representative  
67 fragments of the NP molecule head and foot lobes. The electron density maps gradually  
68 lose the atomicity with the increasing B-factors for the head lobe, while the foot lobe  
69 atomicity is preserved for all chains (also see **Table S1**).

70

71 **Figure S4. Topological diagram of the structures of  $\Delta$ NP<sub>NTD</sub> and VP35 NPBP, related**  
72 **to Figure 2, 3, and 4. (A)**  $\Delta$ NP<sub>NTD</sub> contains a head lobe that is connected to a foot lobe  
73 through a hinge region ( $\alpha$ 7- $\alpha$ 12). **(B)** VP35 NPBP forms a short alpha helix and a 3<sub>10</sub>  
74 helix.

75

76 **Figure S5. MG assay results and TAT-NPBP cell toxicity shows the protein**  
77 **expression for respective MG assay, related to Figure 6. (A-C)** Corresponding  
78 Western blots for results shown in Figure 6 panels **(A)**, **(B)**, and **(C)**, respectively. **(D)**  
79 Growth inhibition analysis for Tat-NPBP peptides reveal no significant cytotoxicity. 293T  
80 cells (1250 cells/well) were plated in a 96-well plate. Next day, the cells were treated with  
81 peptides, control or TAT-NPBP at 3-fold dilutions. 20h later cell toxicity was analyzed  
82 using CellTiter-Glo® (Promega) substrate. In this assay, percent inhibition of minigenome  
83 activity is calculated by normalizing with negative (untreated sample) sample.

84

85 **Figure S6. Comparison of Ebola virus NP with N proteins from NNSV family**  
86 **members VSV and NiV, related to Figure 6.** Structural alignment of NPBP/ $\Delta$ NP<sub>NTD</sub>  
87 complex (green/purple) with **(A)** VSV N<sup>0</sup>/P complex (cyan/orange, PDB 3PMK) and **(B)**  
88 Nipah virus N<sup>0</sup>/P complex (orange/blue, PDB 3CO6) show structural differences between  
89 the nucleoprotein molecules and peptide binding sites. **(C)** Table of structural alignments  
90 of Ebola virus NPBP/ $\Delta$ NP<sub>NTD</sub> with other NNSV N<sup>0</sup>/P protein complexes.

**Table S1. Data collection and refinement statistics**

| Data collection                                              |                                                       |                                                       |                                                       |
|--------------------------------------------------------------|-------------------------------------------------------|-------------------------------------------------------|-------------------------------------------------------|
| Number of crystals                                           | 3 <sup>a</sup>                                        |                                                       |                                                       |
| Space group                                                  | F222                                                  |                                                       |                                                       |
| Resolution range (Å)                                         | 25.00-3.70 (3.72-3.70)                                |                                                       |                                                       |
| Crystal                                                      | 1                                                     | 2                                                     | 3                                                     |
| Wavelength (Å)                                               | 0.97913                                               | 0.98792                                               | 0.98792                                               |
| Cell dimensions<br><i>a</i> , <i>b</i> , <i>c</i> (Å)        | 149.6, 195.0, 347.0                                   | 148.6, 193.9, 345.7                                   | 149.7, 194.8, 347.7                                   |
| Number of unique reflections                                 | 26,688 (1299) <sup>b</sup>                            | 26,497 (1296)                                         | 27,102 (1214)                                         |
| Completeness (%)                                             | 99.8 (100.0)                                          | 99.7 (99.8)                                           | 99.3 (88.8)                                           |
| Redundancy                                                   | 6.0 (5.9)                                             | 5.7 (5.5)                                             | 9.6 (6.6)                                             |
| $\langle I \rangle / \langle \sigma(I) \rangle$ <sup>c</sup> | 17.2/0.9                                              | 16.6/0.5                                              | 30.0/0.1                                              |
| Anisotropic resolution [Å]                                   | 3.9    <i>a</i><br>4.0    <i>b</i><br>3.7    <i>c</i> | 4.1    <i>a</i><br>4.3    <i>b</i><br>3.7    <i>c</i> | 3.9    <i>a</i><br>4.1    <i>b</i><br>3.7    <i>c</i> |
| $R_{merge}$ <sup>d</sup>                                     | 7.6/NA                                                | 6.9/NA                                                | 6.8/NA                                                |
| CC1/2 in the last shell                                      | 0.415                                                 | 0.350                                                 | 0.551                                                 |
| Refinement                                                   |                                                       |                                                       |                                                       |
| Resolution (Å)                                               | 173.84-3.71 (3.80-3.71)                               |                                                       |                                                       |
| Number of reflections (test set)                             | 21,989 (1164)                                         |                                                       |                                                       |
| $R_{work}/R_{free}$ [%]                                      | 25.2/28.5 (34.6/36.7)                                 |                                                       |                                                       |
| Number of non-H atoms                                        | 11,772                                                |                                                       |                                                       |
| Mean B factor (Å <sup>2</sup> )                              |                                                       |                                                       |                                                       |
| • Chain A (NP)                                               | 122                                                   |                                                       |                                                       |
| • Chain B (NP)                                               | 187                                                   |                                                       |                                                       |
| • Chain C (NP)                                               | 88                                                    |                                                       |                                                       |
| • Chain D (NP)                                               | 233                                                   |                                                       |                                                       |
| • Chain E (peptide)                                          | 88                                                    |                                                       |                                                       |
| • Chain F (peptide)                                          | 99                                                    |                                                       |                                                       |
| • Chain G (peptide)                                          | 68                                                    |                                                       |                                                       |
| • Chain H (peptide)                                          | 126                                                   |                                                       |                                                       |
| R.m.s deviations                                             |                                                       |                                                       |                                                       |
| • Bond lengths (Å)                                           | 0.006                                                 |                                                       |                                                       |
| • Bond angle (°)                                             | 1.019                                                 |                                                       |                                                       |
| Molprobit score <sup>e</sup>                                 | 2.21 [100% percentile]                                |                                                       |                                                       |
| Molprobit clashscore                                         | 4.32 [100% percentile]                                |                                                       |                                                       |

<sup>a</sup> Data from three crystals have been used with merging performed at the level of .sca files rather than reflection files, therefore statistics corresponding to each .sca file are provided.

<sup>b</sup> Data for the highest resolution shell are shown in parenthesis.

<sup>c</sup> Crystals diffracted anisotropically. The correction for anisotropy was applied during scaling data with Scalepack.

<sup>d</sup>  $R_{merge}$  higher than 1 is statistically meaningless, therefore Scalepack (Minor, 1997) does not report it.

<sup>e</sup> Carried out using MolProbit (Chen et al., 2010).

Figure S1, related to Figure 1 and 2

A

Filovirus/Paramyxovirus conserved

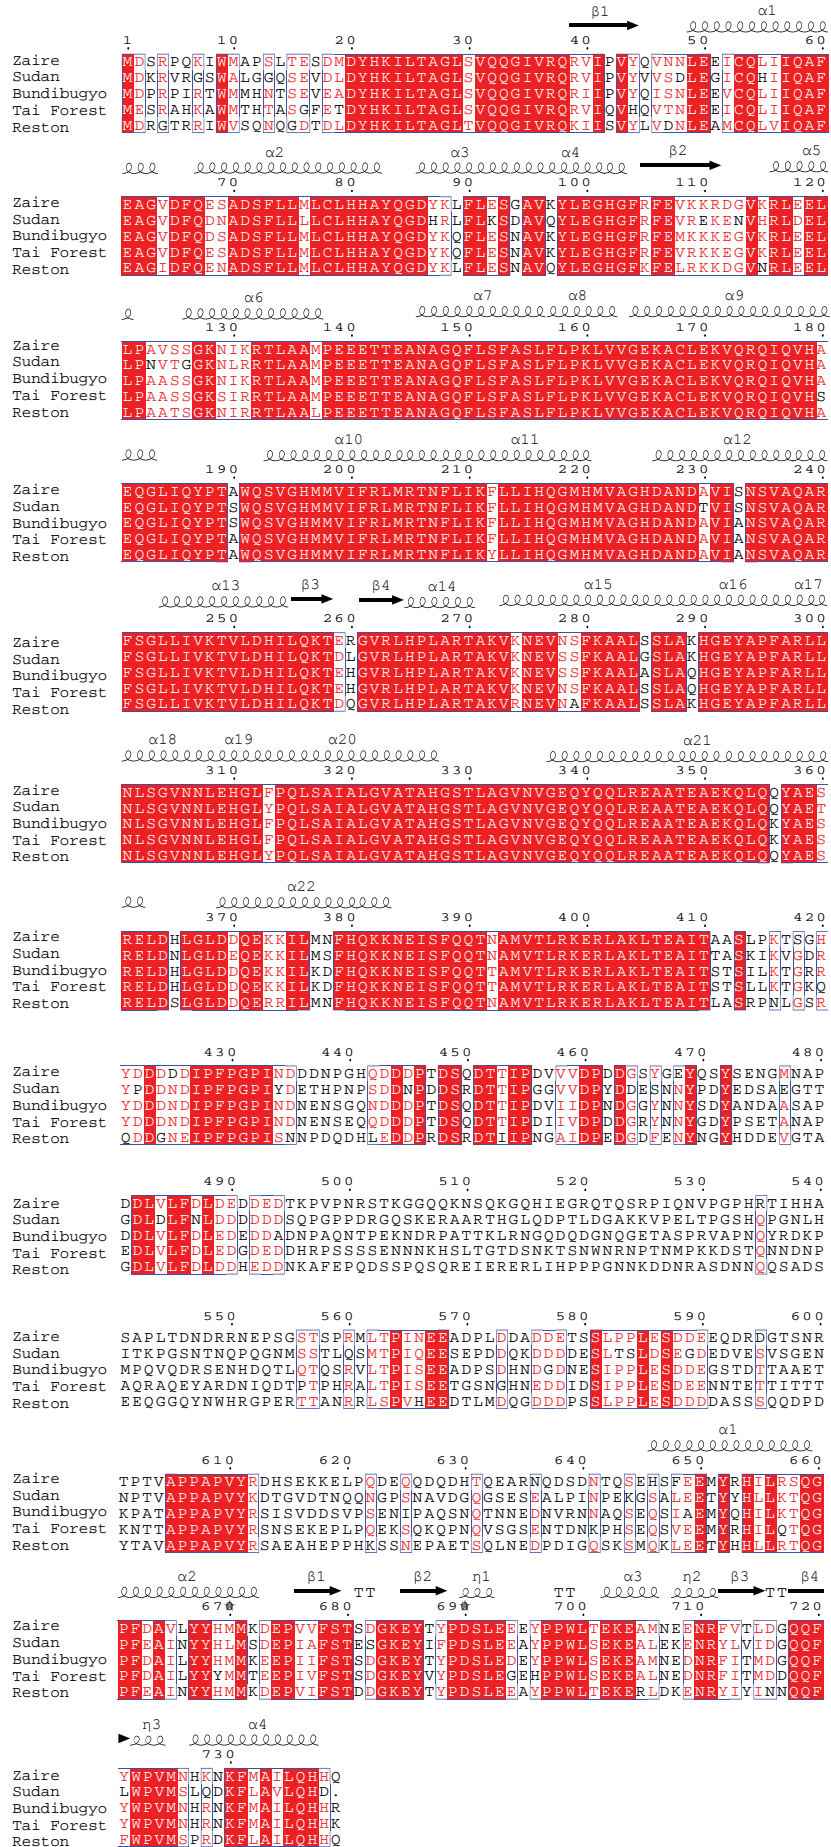

Filovirus specific

**Figure S1, related to Figure 1 and 2 continued**

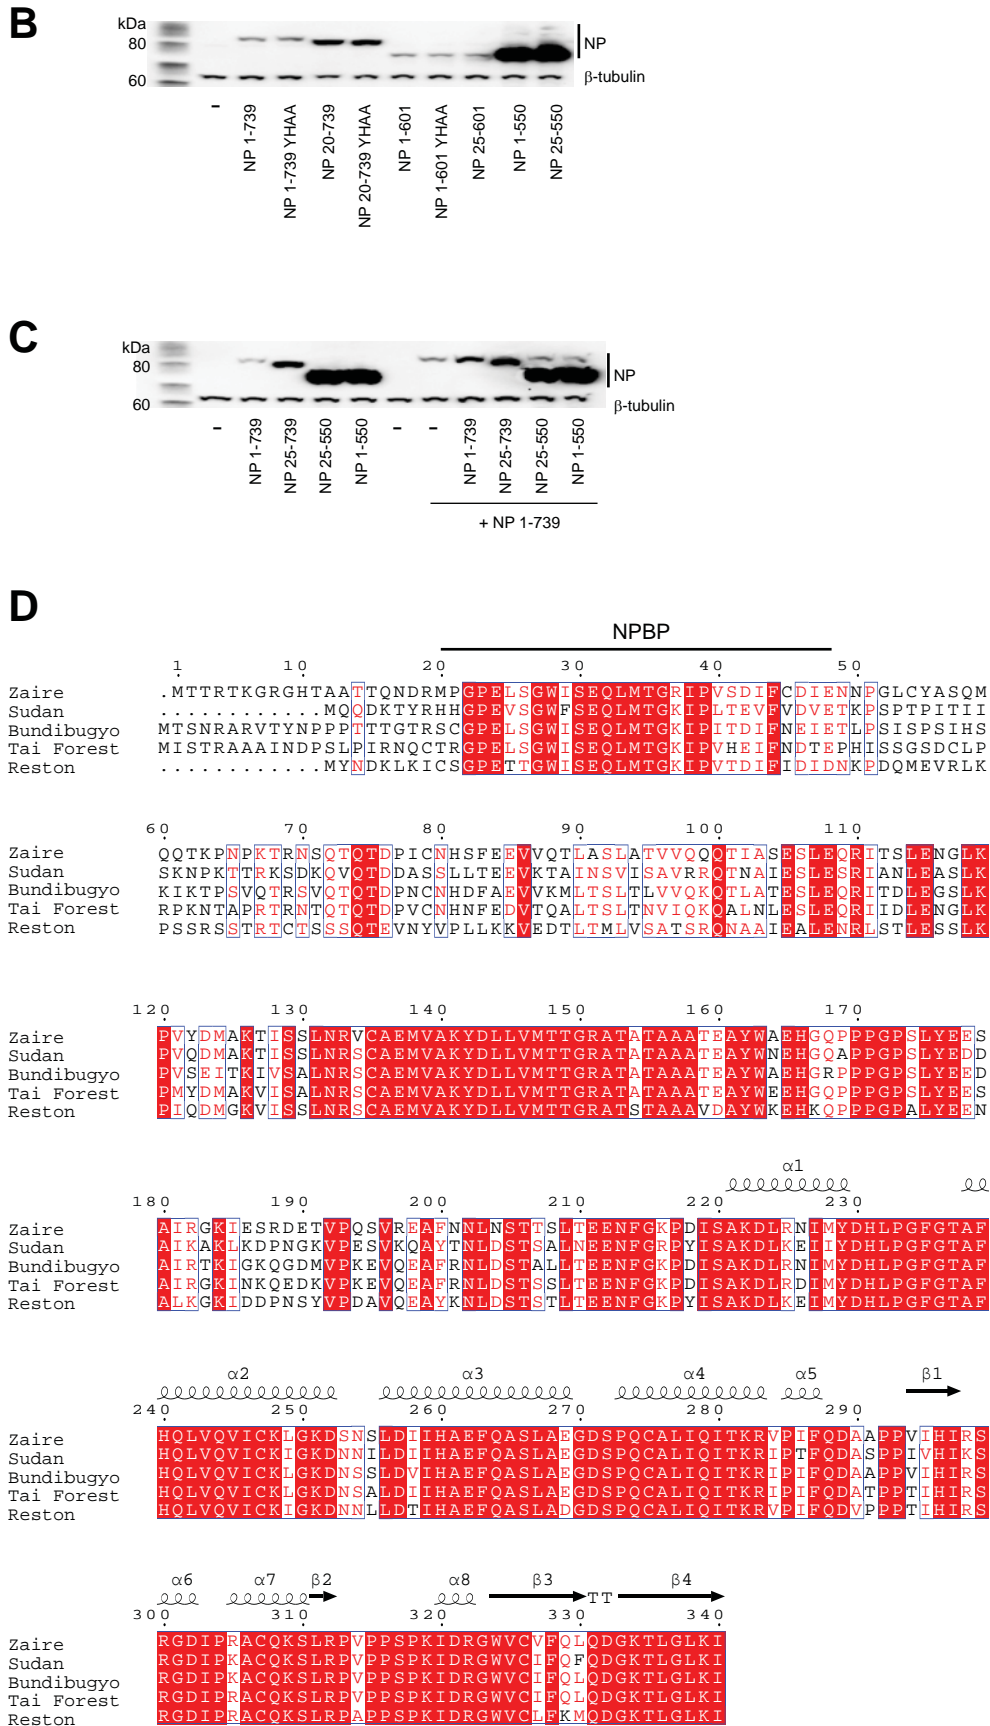

**Figure S2, related to Figure 2 and 3**

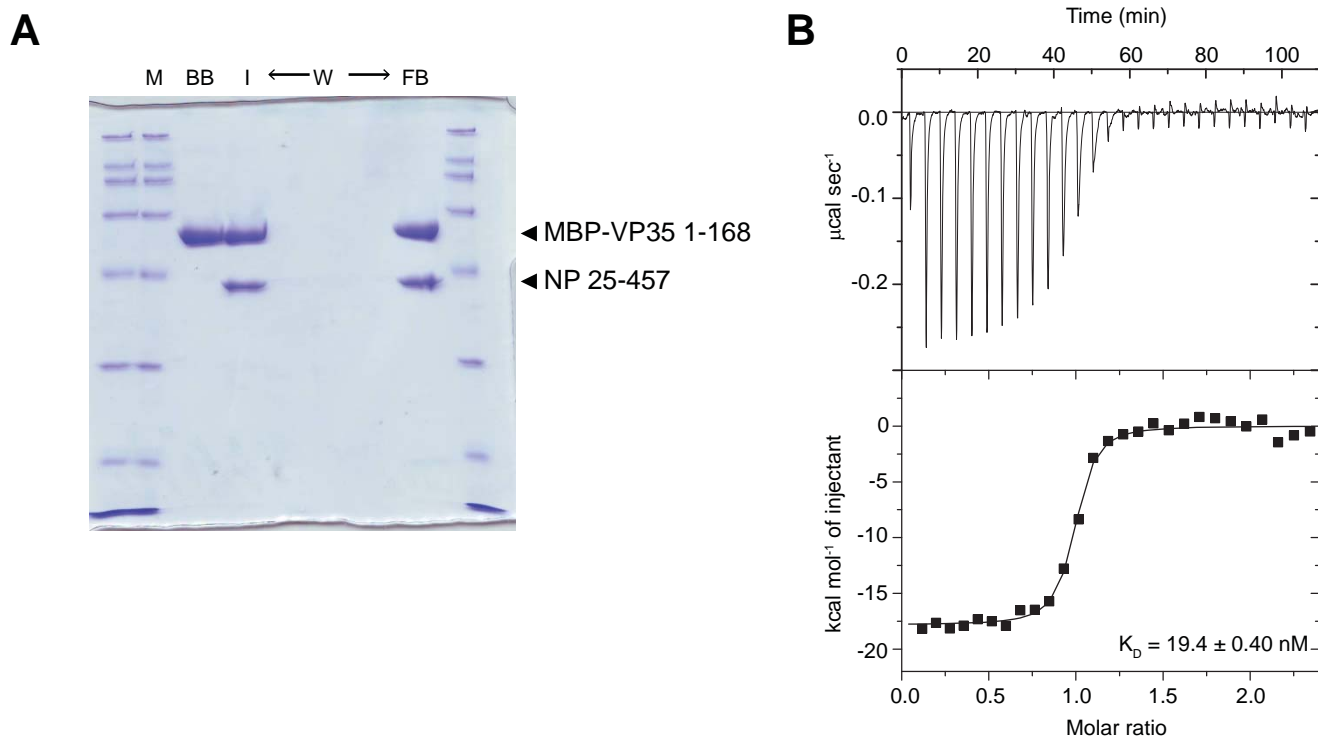

**C**

Summary of EBOV VP35 NPBP analysis

| Construct  | Sequence                            | Theoretical difference in BSA (Å <sup>2</sup> )* | $K_D$ (nM) <sup>†</sup> | helical in TFE <sup>‡</sup> |
|------------|-------------------------------------|--------------------------------------------------|-------------------------|-----------------------------|
| VP35 20-48 | 20-MPGPELSGWISEQLMTGRIPVSDIFCDIE-48 | 0                                                | 28.9 ± 6.4              | yes                         |
| VP35 26-48 | 26-SGWISEQLMTGRIPVSDIFCDIE          | 354                                              | 237 ± 49                | yes                         |
| VP35 27-48 | 27-GWISEQLMTGRIPVSDIFCDIE           | 374                                              | 162 ± 25                | yes                         |
| VP35 28-48 | 28-WISEQLMTGRIPVSDIFCDIE            | 392                                              | 215 ± 62                | yes                         |
| VP35 29-48 | 29-ISEQLMTGRIPVSDIFCDIE             | 392                                              | n.d.                    | no                          |
| VP35 30-48 | 30-SEQLMTGRIPVSDIFCDIE              | 426                                              | n.d.                    | no                          |
| VP35 20-45 | 20-MPGPELSGWISEQLMTGRIPVSDIFC-45    | 63                                               | 2.18 ± 2.2              | yes                         |
| VP35 20-44 | 20-MPGPELSGWISEQLMTGRIPVSDIF-44     | 94                                               | 7.83 ± 2.8              | yes                         |
| VP35 20-43 | 20-MPGPELSGWISEQLMTGRIPVSDI-43      | 220                                              | n.d.                    | yes                         |
| VP35 20-42 | 20-MPGPELSGWISEQLMTGRIPVSD-42       | 302                                              | n.d.                    | yes                         |

\*Theoretical difference in buried surface area (BSA) values represent the sum of all deleted residues.

<sup>†</sup> $K_D$  values were calculated from at least three independent ITC experiments. All experiments conducted in 150 mM NaCl.

<sup>‡</sup>Helical propensities in trifluoroethanol (TFE) were determined by CD measurements.



Figure S2, related to Figure 2 and 3 continued

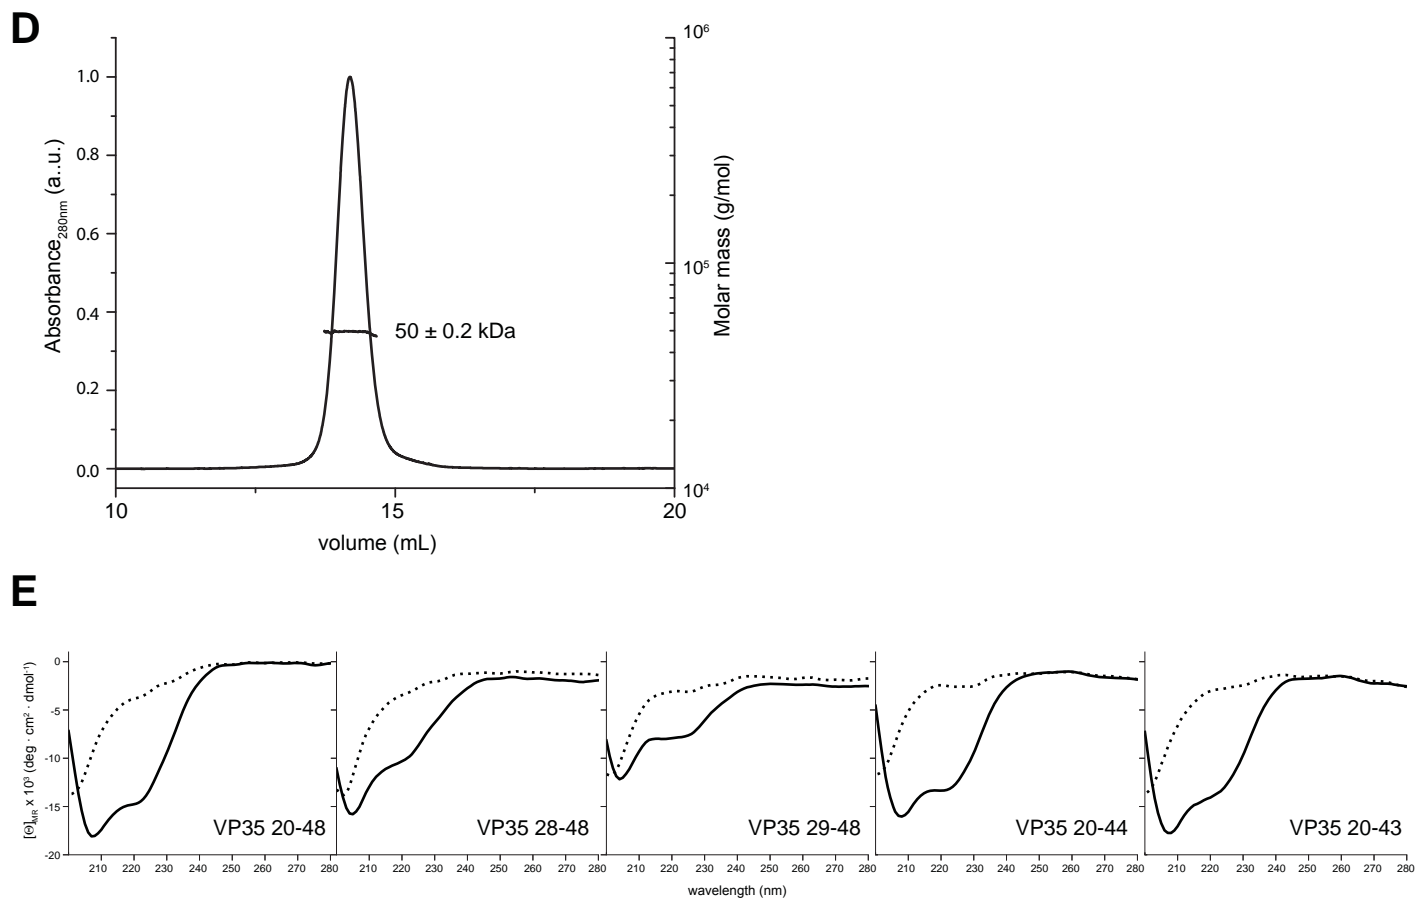

Figure S3, related to Figure 2, 3, 4

A

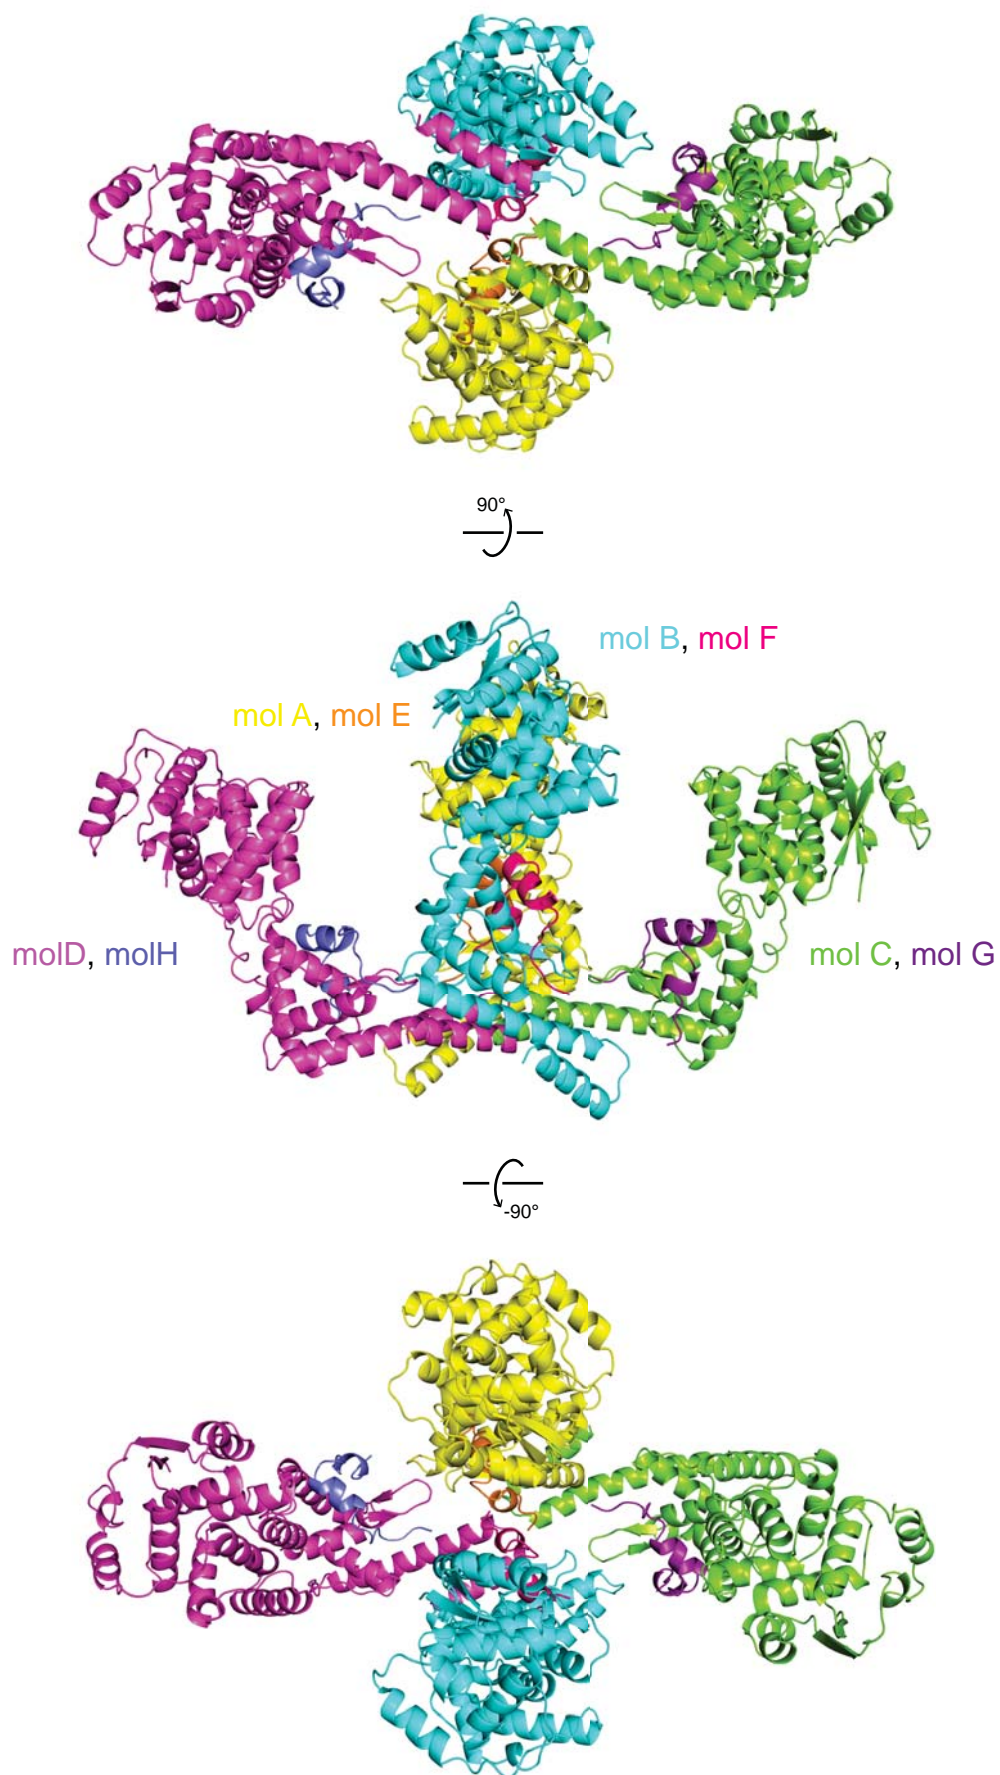

Figure S3, related to Figure 2, 3, 4 continued

**B**

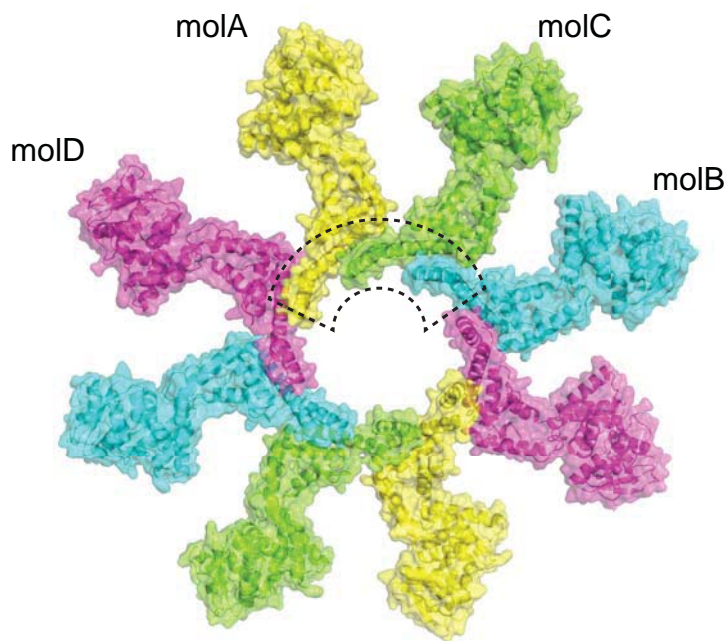

**C**

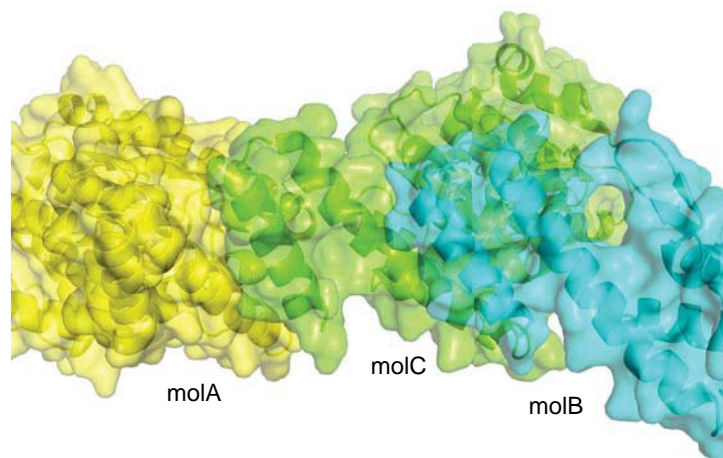

**D**

residues 147-162 (head lobe)

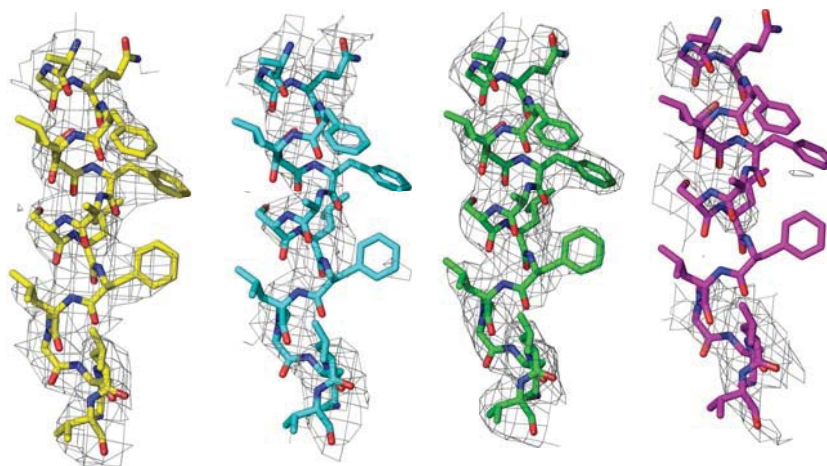

residues 314-327 (foot lobe)

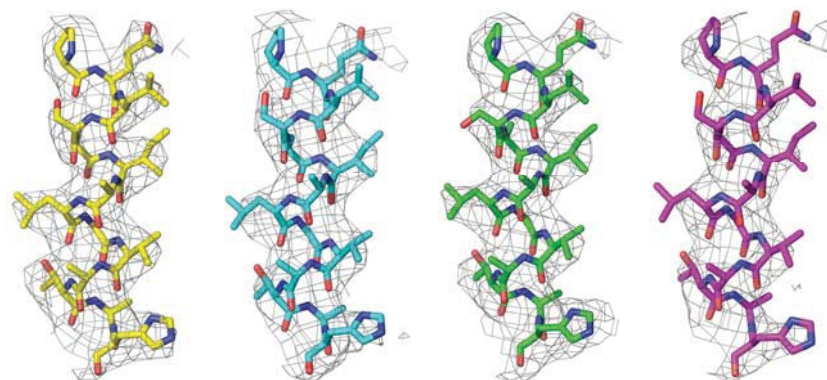

chain A  
 $B_{ave} = 122 \text{ \AA}^2$

chain B  
 $B_{ave} = 187 \text{ \AA}^2$

chain C  
 $B_{ave} = 88 \text{ \AA}^2$

chain D  
 $B_{ave} = 233 \text{ \AA}^2$

Figure S4, related to Figure 2, 3, 4

A

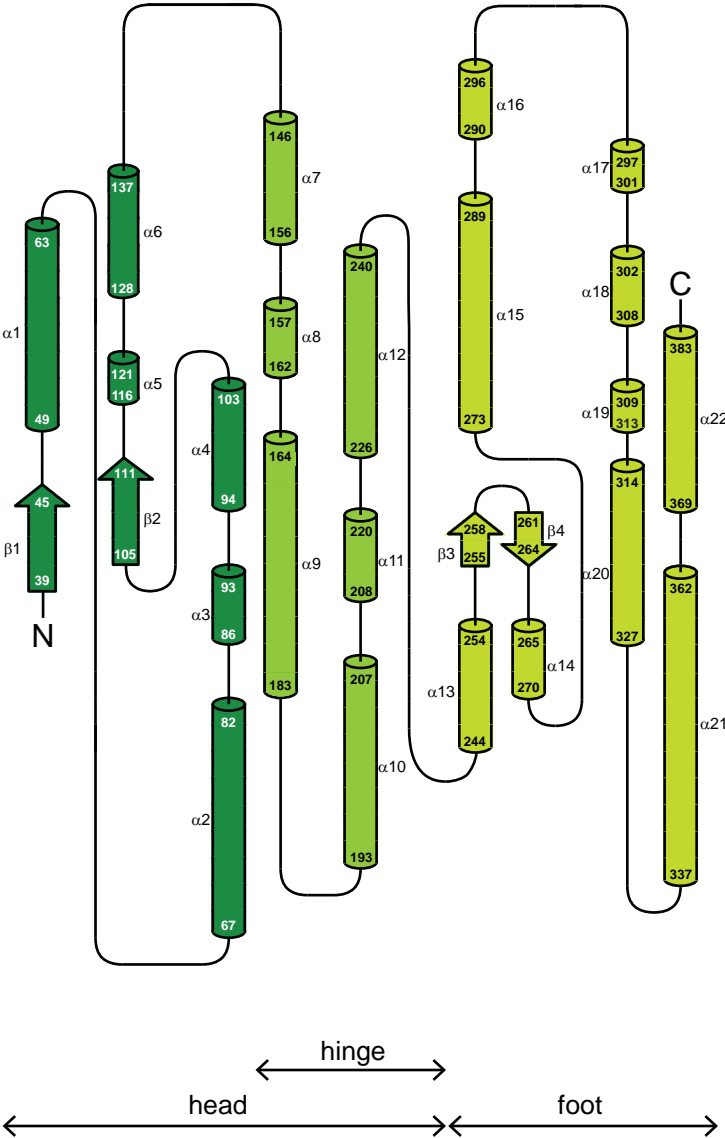

B

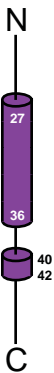

**Figure S5, related to Figure 7**

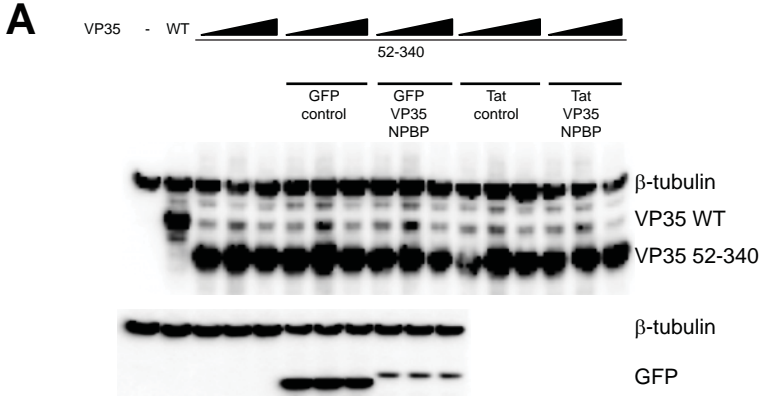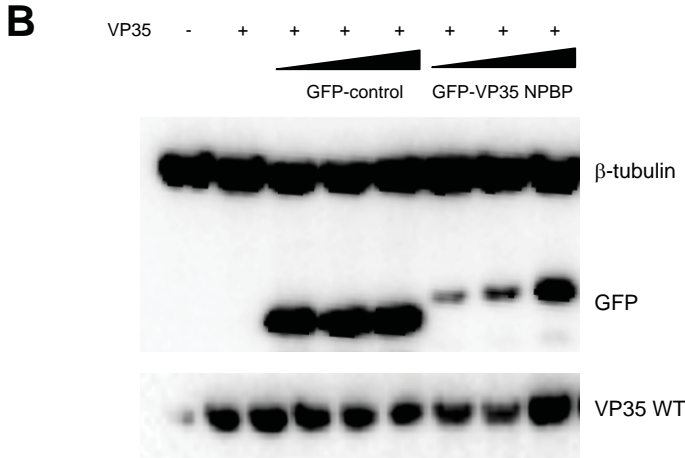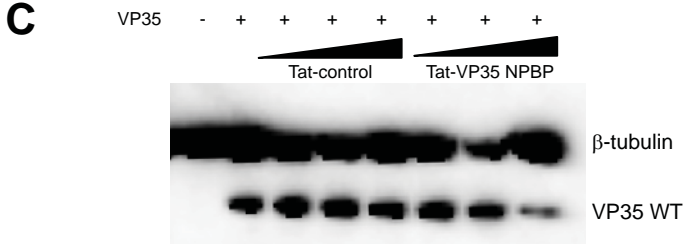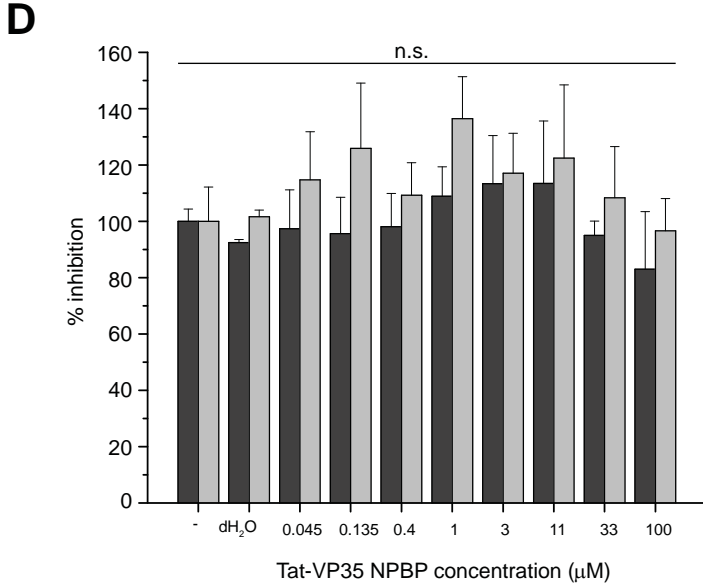

**Figure S6, related to Figure 7**

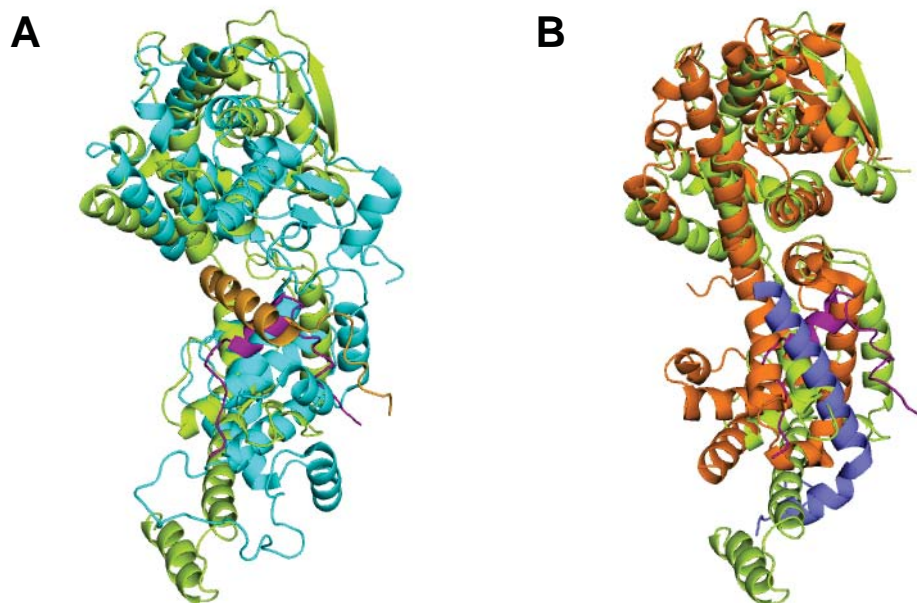

**C**  
Structural alignment of the nucleoprotein N-terminal domain\*

|                                                    | VSV<br>(residues 19-222) | Nipah<br>(residues 32-258) | Rabies<br>(residues 32-234) | RSV<br>(residues 2-253) |
|----------------------------------------------------|--------------------------|----------------------------|-----------------------------|-------------------------|
| EBOV<br>(residues 37-240)<br>(aligned<br>residues) | 5.0 Å<br>(144)           | 5.1 Å<br>(176)             | 6.3 Å<br>(136)              | 4.7 Å<br>(176)          |

\*PDB 3PMK, 3CO6, 2GTT, and 2WJ8 were used

## REFERENCES

Chen, V.B., III, W.B.A., Headd, J.J., Keedy, D.A., Immormino, R.M., Kapral, G.J., Murray, L.W., Richardson, J.S., and Richardson, D.C. (2010). MolProbity: all-atom structure validation for macromolecular crystallography. *Acta Crystallographica D66*, 12-21.

Otwinowski, Z. and Minor, W. (1997). Processing of X-ray diffraction data collected in oscillation mode. *Methods in Enzymology 276*, 307-326.
